# Supplementary material for: Phytase Supplementation Effects on Amino Acid Digestibility in Broiler Chickens are Influenced by Dietary Calcium Concentrations but not by Acid-Binding Capacity
Source: PubMed Central journal article supplement — Curr Dev Nutr. 2021 Jul 24;5(8):nzab103. doi: 10.1093/cdn/nzab103 (PMC8382274; doi:10.1093/cdn/nzab103), 2021-07-24
Supplement: nzab103_supplemental_file.pdf [file nzab103_supplemental_file.pdf]

# Phytase supplementation effects on amino acid digestibility in broiler chickens are influenced by dietary calcium concentrations but not by acid-binding capacity

Wolfgang Siegert, Jochen Krieg, Vera Sommerfeld, Daniel Borda-Molina, Dieter Feuerstein, Amélia Camarinha-Silva, and Markus Rodehutschord

## Online Supplementary Material

### Table of contents

|                                                                                                                                                                     |    |
|---------------------------------------------------------------------------------------------------------------------------------------------------------------------|----|
| Supplemental Table 1. Ingredient composition of the experimental diets .....                                                                                        | 2  |
| Supplemental Table 2. Diet analyses .....                                                                                                                           | 3  |
| Supplemental Table 3. Pearson correlation coefficients between prececal amino acid digestibility and relative abundance of OTUs in the crop and ileum content ..... | 4  |
| Supplemental Table 4. Percent of genes assigned to enzymes related to protein digestion and absorption as well as amino acid metabolism in crop content .....       | 5  |
| Supplemental Table 5. Percent of genes assigned to enzymes related to protein digestion and absorption as well as amino acid metabolism in ileum content .....      | 7  |
| Supplemental Figure 1. Relationship between prececal amino acid digestibility and feed intake .....                                                                 | 9  |
| Supplemental Figure 2. Relationship between prececal amino acid digestibility and crop content pH .....                                                             | 10 |
| Supplemental Figure 3. Relationship between prececal amino acid digestibility and gizzard content pH .....                                                          | 11 |
| Supplemental Figure 4. Relationship between prececal amino acid digestibility and phytate concentrations in the crop content .....                                  | 12 |
| Supplemental Figure 5. Relationship between prececal amino acid digestibility and ileum content pH .....                                                            | 13 |
| Supplemental Figure 6. Relationship between prececal amino acid digestibility and calcium concentrations in the ileum content .....                                 | 14 |
| Supplemental Figure 7. Relationship between prececal amino acid digestibility and phytate concentrations in the ileum content .....                                 | 15 |
| Supplemental Figure 8. Relationship between prececal amino acid digestibility and phosphorus concentrations in the ileum content .....                              | 16 |
| Reference .....                                                                                                                                                     | 17 |

**Supplemental Table 1.** Ingredient composition of the experimental diets

| Acid-binding capacity<br>Calcium concentration<br>Phytase | CaCO <sub>3</sub> |       |       |       | CaCO <sub>3</sub> +formic acid |        |       |       | Calcium formate |       |      |       |
|-----------------------------------------------------------|-------------------|-------|-------|-------|--------------------------------|--------|-------|-------|-----------------|-------|------|-------|
|                                                           | low               |       | high  |       | low                            |        | high  |       | low             |       | high |       |
|                                                           | -                 | +     | -     | +     | -                              | +      | -     | +     | -               | +     | -    | +     |
| CaCO <sub>3</sub>                                         | 7.32              |       | 13.83 |       | 7.32                           |        | 13.83 |       | 0               |       | 0    |       |
| Formic acid                                               | 0                 |       | 0     |       | 6                              |        | 6     |       | 0               |       | 0    |       |
| Ca-formate                                                | 0                 |       | 0     |       | 0                              |        | 0     |       | 9.51            |       | 18.2 |       |
| Diamol                                                    | 12.51             |       | 6     |       | 6.51                           |        | 0     |       | 10.32           |       | 1.63 |       |
| Phytase (FTU/kg) <sup>1</sup>                             | 0                 | 1,500 | 0     | 1,500 | 0                              | 1,500  | 0     | 1,500 | 0               | 1,500 | 0    | 1,500 |
| Corn                                                      |                   |       |       |       |                                | 440.67 |       |       |                 |       |      |       |
| Soybean meal                                              |                   |       |       |       |                                | 300    |       |       |                 |       |      |       |
| Rapeseed meal                                             |                   |       |       |       |                                | 100    |       |       |                 |       |      |       |
| Sunflower meal                                            |                   |       |       |       |                                | 100    |       |       |                 |       |      |       |
| Soybean oil                                               |                   |       |       |       |                                | 25     |       |       |                 |       |      |       |
| Premix <sup>2</sup>                                       |                   |       |       |       |                                | 5      |       |       |                 |       |      |       |
| Titanium dioxide                                          |                   |       |       |       |                                | 5      |       |       |                 |       |      |       |
| NaCl                                                      |                   |       |       |       |                                | 4      |       |       |                 |       |      |       |
| DL-Methionine                                             |                   |       |       |       |                                | 0.5    |       |       |                 |       |      |       |

<sup>1</sup> Added on top of the diets.

<sup>2</sup> Supplied per kg of diet: 12,000 IU vitamin A (retinyl acetate), 2,500 IU vitamin D3 (cholecalciferol), 50 mg vitamin E (DL- $\alpha$ -tocopherol), 1.5 mg vitamin K3 (menadione), 2.0 mg vitamin B1 (thiamine), 7.5 mg vitamin B2 (riboflavin), 3.5 mg vitamin B6 (pyridoxine), 20  $\mu$ g vitamin B12 (cyanocobalamin), 30 mg niacin, 12 mg pantothenic acid, 460 mg choline chloride, 1.0 mg folic acid, 0.2 mg biotin, 80 mg iron, 12 mg copper, 85 mg manganese, 60 mg zinc, 0.8 mg iodine, 0.15 mg selenium, 125 mg anti-oxidant.

**Supplemental Table 2.** Analyzed nutrient composition of the experimental diets (g/kg dry matter, unless otherwise stated).<sup>1,2</sup>

| Acid-binding capacity<br>Ca concentration | CaCO <sub>3</sub> |       |      |       | CaCO <sub>3</sub> +formic acid |       |      |       | Ca-formate |       |      |       |
|-------------------------------------------|-------------------|-------|------|-------|--------------------------------|-------|------|-------|------------|-------|------|-------|
|                                           | low               |       | high |       | low                            |       | high |       | low        |       | high |       |
|                                           | -                 | +     | -    | +     | -                              | +     | -    | +     | -          | +     | -    | +     |
| Phytase <sup>1</sup>                      |                   |       |      |       |                                |       |      |       |            |       |      |       |
| Calcium                                   | 5.6               | 5.6   | 8.0  | 8.1   | 5.5                            | 5.5   | 8.2  | 8.1   | 5.7        | 5.6   | 8.3  | 8.2   |
| Phosphorus                                | 5.3               | 5.3   | 5.3  | 5.2   | 5.3                            | 5.3   | 5.4  | 5.3   | 5.2        | 5.4   | 5.3  | 5.3   |
| Phytate-P                                 | 3.6               | 3.5   | 3.5  | 3.5   | 3.5                            | 3.5   | 3.6  | 3.6   | 3.5        | 3.5   | 3.3  | 3.6   |
| Phytase (FTU/kg)                          | < 60              | 1,450 | < 60 | 1,580 | < 60                           | 1,460 | < 60 | 1,450 | < 60       | 1,470 | < 60 | 1,480 |
| Crude protein                             | 266               | 260   | 263  | 262   | 264                            | 262   | 262  | 262   | 259        | 263   | 259  | 262   |
| Amino acids                               |                   |       |      |       |                                |       |      |       |            |       |      |       |
| Alanine                                   | 13.0              | 13.0  | 12.7 | 12.6  | 12.8                           | 13.0  | 12.8 | 12.8  | 12.7       | 12.8  | 12.5 | 12.6  |
| Arginine                                  | 18.1              | 18.1  | 17.8 | 17.5  | 17.8                           | 18.2  | 18.0 | 17.9  | 17.6       | 17.9  | 17.4 | 17.7  |
| Aspartic acid/asparagine                  | 27.2              | 27.2  | 26.8 | 26.5  | 26.8                           | 27.6  | 27.0 | 27.1  | 26.6       | 27.2  | 26.3 | 26.7  |
| Cysteine                                  | 4.4               | 4.3   | 4.3  | 4.3   | 4.3                            | 4.3   | 4.3  | 4.2   | 4.2        | 4.2   | 4.1  | 4.2   |
| Glutamic acid/glutamine                   | 48.6              | 48.6  | 48.0 | 47.5  | 48.2                           | 49.2  | 48.4 | 48.5  | 47.8       | 48.5  | 47.3 | 47.8  |
| Glycine                                   | 12.2              | 12.3  | 12.0 | 11.9  | 12.0                           | 12.4  | 12.1 | 12.0  | 12.0       | 12.1  | 11.8 | 11.8  |
| Histidine                                 | 7.9               | 7.8   | 7.7  | 7.6   | 7.7                            | 7.7   | 7.8  | 7.6   | 7.5        | 7.7   | 7.4  | 7.5   |
| Isoleucine                                | 11.3              | 11.4  | 11.2 | 11.0  | 11.1                           | 11.7  | 11.1 | 11.5  | 11.3       | 11.3  | 11.1 | 11.1  |
| Leucine                                   | 21.8              | 21.7  | 21.4 | 21.1  | 21.4                           | 22.0  | 21.4 | 21.5  | 21.3       | 21.5  | 21.1 | 21.2  |
| Lysine                                    | 14.1              | 14.2  | 14.0 | 13.8  | 13.9                           | 14.4  | 14.0 | 14.1  | 13.8       | 14.1  | 13.7 | 13.8  |
| Methionine                                | 4.9               | 5.0   | 4.9  | 4.8   | 4.9                            | 5.0   | 4.9  | 4.9   | 4.8        | 4.9   | 4.8  | 4.8   |
| Phenylalanine                             | 13.1              | 13.1  | 12.9 | 12.7  | 12.8                           | 13.2  | 12.9 | 13.0  | 12.8       | 12.9  | 12.7 | 12.7  |
| Proline                                   | 14.9              | 14.9  | 14.8 | 14.4  | 14.8                           | 14.9  | 14.7 | 14.5  | 14.5       | 14.8  | 14.4 | 14.4  |
| Serine                                    | 13.5              | 13.4  | 13.3 | 13.1  | 13.4                           | 13.5  | 13.5 | 13.2  | 13.1       | 13.4  | 13.0 | 13.2  |
| Threonine                                 | 10.9              | 10.9  | 10.7 | 10.6  | 10.7                           | 10.9  | 10.8 | 10.7  | 10.6       | 10.8  | 10.5 | 10.6  |
| Tyrosine                                  | 8.8               | 8.8   | 8.7  | 8.5   | 8.7                            | 8.8   | 8.7  | 8.7   | 8.6        | 8.6   | 8.5  | 8.6   |
| Valine                                    | 12.6              | 12.7  | 12.5 | 12.3  | 12.4                           | 13.0  | 12.4 | 12.8  | 12.6       | 12.5  | 12.4 | 12.3  |

<sup>1</sup> - without phytase supplementation; + with supplementation of 1,500 FTU phytase/kg.<sup>2</sup> Further analyzed compounds are shown in the companion paper (1).

**Supplemental Table 3.** Pearson correlation coefficients between prececal amino acid digestibility and relative abundance of OTUs in the crop and ileum content of broiler chickens.<sup>1</sup>

|     | Crop microbiota <sup>2</sup> |       | Ileum microbiota <sup>3</sup> |      |       |
|-----|------------------------------|-------|-------------------------------|------|-------|
|     | OTU2                         | OTU13 | OTU1                          | OTU7 | OTU10 |
| Ala |                              |       |                               | 0.32 | -0.43 |
| Arg |                              |       | 0.31                          |      | -0.33 |
| Asx | -0.26                        | -0.26 | 0.31                          |      | -0.33 |
| Cys |                              |       | 0.29                          |      |       |
| Glx | -0.25                        | 0.24  | 0.32                          |      | -0.34 |
| Gly |                              |       | 0.32                          |      | -0.35 |
| His |                              |       |                               |      | -0.40 |
| Ile |                              |       | 0.31                          |      | -0.37 |
| Leu |                              |       | 0.29                          | 0.28 | -0.41 |
| Lys |                              |       | 0.28                          | 0.27 | -0.38 |
| Met |                              |       |                               | 0.31 | -0.46 |
| Phe |                              |       | 0.30                          |      | -0.37 |
| Pro |                              |       | 0.30                          |      | -0.38 |
| Ser |                              |       | 0.31                          |      | -0.35 |
| Thr |                              |       | 0.28                          | 0.29 | -0.39 |
| Tyr |                              |       | 0.29                          |      | -0.37 |
| Val |                              |       | 0.30                          | 0.27 | -0.38 |

<sup>1</sup> n = 12 diets; only significant ( $P \leq 0.05$ ) correlations are presented; values for relative abundance of OTUs published in the corresponding communication (1); Ala, alanine; Arg, arginine; Asx, aspartic acid/asparagine; Ca, calcium; Cys, cysteine; Glx, glutamic acid/glutamine; Gly, glycine; His, histidine; Ile, isoleucine; Leu, leucine; Lys, lysine; Met, methionine; Phe, phenylalanine; Pro, proline; Ser, serine; Thr, threonine; Tyr, tyrosine; Val, valine.

<sup>2</sup> OTU2 and OTU13 assigned to *Lactobacillus gallinarum* and *Lactobacillus reuteri*, respectively.

<sup>3</sup> OTU1, OTU7, and OTU10 assigned to *Lactobacillus johnsonii*, Uncultured Firmicutes, and *Salmonella alactolyticus*, respectively.

**Supplemental Table 4.** Percent of genes assigned to enzymes related to protein digestion and absorption as well as amino acid metabolism listed in the KEGG database in crop content of broiler chickens fed with differently acidified diets with low and high Ca concentrations without (-) and with (+) supplementation of 1,500 FTU phytase/kg.<sup>1</sup>

| ABC                                                 | Ca concentration | Phytase | 01230               | 00220               | 00250               | 00260               | 00270               | 00280  | 00290               | 00300              | 00310               | 00330              | 00340  | 00350              | 00360              | 00380               | 00400               | 04974                |
|-----------------------------------------------------|------------------|---------|---------------------|---------------------|---------------------|---------------------|---------------------|--------|---------------------|--------------------|---------------------|--------------------|--------|--------------------|--------------------|---------------------|---------------------|----------------------|
| <i>Treatments</i>                                   |                  |         |                     |                     |                     |                     |                     |        |                     |                    |                     |                    |        |                    |                    |                     |                     |                      |
| CaCO <sub>3</sub>                                   | low              | -       | 0.040               | 0.296               | 0.710               | 1.006               | 0.878               | 0.166  | 0.064               | 0.675              | 0.116               | 0.226              | 0.063  | 0.225              | 0.038              | 0.096               | 0.094               | 2.426                |
|                                                     |                  | +       | 0.039               | 0.267               | 0.709               | 0.958               | 0.811               | 0.165  | 0.071               | 0.676              | 0.130               | 0.246              | 0.059  | 0.262              | 0.058              | 0.115               | 0.103               | 2.344                |
|                                                     | high             | -       | 0.033               | 0.324               | 0.739               | 0.989               | 0.902               | 0.151  | 0.070               | 0.711              | 0.114               | 0.246              | 0.040  | 0.259              | 0.063              | 0.093               | 0.102               | 2.448                |
|                                                     |                  | +       | 0.032               | 0.308               | 0.740               | 0.959               | 0.853               | 0.179  | 0.070               | 0.710              | 0.121               | 0.255              | 0.063  | 0.276              | 0.067              | 0.103               | 0.098               | 2.392                |
| CaCO <sub>3</sub> +<br>formic acid                  | low              | -       | 0.031               | 0.334               | 0.759               | 0.995               | 0.927               | 0.148  | 0.067               | 0.726              | 0.107               | 0.250              | 0.037  | 0.259              | 0.057              | 0.084               | 0.095               | 2.474                |
|                                                     |                  | +       | 0.030               | 0.333               | 0.756               | 0.963               | 0.900               | 0.182  | 0.080               | 0.713              | 0.117               | 0.270              | 0.060  | 0.274              | 0.078              | 0.097               | 0.115               | 2.467                |
|                                                     | high             | -       | 0.026               | 0.335               | 0.763               | 0.958               | 0.886               | 0.142  | 0.083               | 0.728              | 0.114               | 0.266              | 0.028  | 0.288              | 0.082              | 0.096               | 0.115               | 2.463                |
|                                                     |                  | +       | 0.028               | 0.331               | 0.764               | 0.947               | 0.874               | 0.135  | 0.081               | 0.720              | 0.116               | 0.263              | 0.030  | 0.286              | 0.075              | 0.098               | 0.109               | 2.436                |
| Ca-formate                                          | low              | -       | 0.035               | 0.324               | 0.741               | 1.027               | 0.935               | 0.173  | 0.056               | 0.726              | 0.103               | 0.225              | 0.053  | 0.238              | 0.043              | 0.079               | 0.079               | 2.458                |
|                                                     |                  | +       | 0.030               | 0.320               | 0.753               | 1.001               | 0.899               | 0.178  | 0.056               | 0.736              | 0.104               | 0.234              | 0.059  | 0.262              | 0.049              | 0.084               | 0.074               | 2.425                |
|                                                     | high             | -       | 0.033               | 0.316               | 0.747               | 0.999               | 0.900               | 0.155  | 0.059               | 0.730              | 0.108               | 0.236              | 0.045  | 0.258              | 0.053              | 0.087               | 0.081               | 2.425                |
|                                                     |                  | +       | 0.033               | 0.306               | 0.738               | 0.960               | 0.853               | 0.195  | 0.070               | 0.711              | 0.121               | 0.254              | 0.070  | 0.278              | 0.070              | 0.103               | 0.099               | 2.387                |
|                                                     | SEM              |         | 0.0023              | 0.0078              | 0.0082              | 0.0163              | 0.0172              | 0.0213 | 0.0085              | 0.0134             | 0.0064              | 0.0098             | 0.0133 | 0.0092             | 0.0114             | 0.0073              | 0.0145              | 0.0190               |
| <i>Significant two-way interactions<sup>2</sup></i> |                  |         |                     |                     |                     |                     |                     |        |                     |                    |                     |                    |        |                    |                    |                     |                     |                      |
| ABC × Ca concentration                              |                  |         |                     |                     |                     |                     |                     |        |                     |                    |                     |                    |        |                    |                    |                     |                     |                      |
| CaCO <sub>3</sub>                                   | low              |         | 0.027 <sup>c</sup>  | 0.333 <sup>a</sup>  | 0.763 <sup>a</sup>  | .                   | 0.880 <sup>bc</sup> | .      | .                   | 0.724 <sup>a</sup> | .                   | .                  | .      | .                  | .                  | .                   | .                   | 2.449 <sup>ab</sup>  |
|                                                     | high             |         | 0.030 <sup>bc</sup> | 0.333 <sup>a</sup>  | 0.757 <sup>ab</sup> | .                   | 0.913 <sup>ab</sup> | .      | .                   | 0.719 <sup>a</sup> | .                   | .                  | .      | .                  | .                  | .                   | .                   | 2.470 <sup>a</sup>   |
| CaCO <sub>3</sub> +<br>formic acid                  | low              |         | 0.033 <sup>b</sup>  | 0.311 <sup>b</sup>  | 0.743 <sup>bc</sup> | .                   | 0.876 <sup>cd</sup> | .      | .                   | 0.720 <sup>a</sup> | .                   | .                  | .      | .                  | .                  | .                   | .                   | 2.406 <sup>cd</sup>  |
|                                                     | high             |         | 0.033 <sup>b</sup>  | 0.322 <sup>ab</sup> | 0.747 <sup>bc</sup> | .                   | 0.917 <sup>a</sup>  | .      | .                   | 0.731 <sup>a</sup> | .                   | .                  | .      | .                  | .                  | .                   | .                   | 2.442 <sup>abc</sup> |
| Ca-formate                                          | low              |         | 0.033 <sup>b</sup>  | 0.316 <sup>b</sup>  | 0.740 <sup>c</sup>  | .                   | 0.878 <sup>cd</sup> | .      | .                   | 0.710 <sup>a</sup> | .                   | .                  | .      | .                  | .                  | .                   | .                   | 2.420 <sup>cd</sup>  |
|                                                     | high             |         | 0.040 <sup>a</sup>  | 0.282 <sup>c</sup>  | 0.709 <sup>d</sup>  | .                   | 0.844 <sup>d</sup>  | .      | .                   | 0.676 <sup>b</sup> | .                   | .                  | .      | .                  | .                  | .                   | .                   | 2.385 <sup>d</sup>   |
| SEM                                                 |                  |         | 0.0018              | 0.0055              | 0.0062              |                     | 0.0122              |        |                     | 0.0101             |                     |                    |        |                    |                    |                     |                     |                      |
| <i>Significant main effects<sup>3</sup></i>         |                  |         |                     |                     |                     |                     |                     |        |                     |                    |                     |                    |        |                    |                    |                     |                     |                      |
| CaCO <sub>3</sub>                                   |                  |         | .                   | .                   | .                   | 0.966 <sup>b</sup>  | .                   | .      | 0.078 <sup>a</sup>  | .                  | 0.114 <sup>ab</sup> | 0.262 <sup>a</sup> | .      | 0.277 <sup>a</sup> | 0.073 <sup>a</sup> | 0.094 <sup>ab</sup> | 0.109 <sup>a</sup>  | .                    |
| CaCO <sub>3</sub> + formic acid                     |                  |         | .                   | .                   | .                   | 0.997 <sup>a</sup>  | .                   | .      | 0.060 <sup>b</sup>  | .                  | 0.109 <sup>b</sup>  | 0.237 <sup>b</sup> | .      | 0.259 <sup>b</sup> | 0.054 <sup>b</sup> | 0.088 <sup>b</sup>  | 0.083 <sup>b</sup>  | .                    |
| Ca-formate                                          |                  |         | .                   | .                   | .                   | 0.978 <sup>ab</sup> | .                   | .      | 0.069 <sup>ab</sup> | .                  | 0.120 <sup>a</sup>  | 0.243 <sup>b</sup> | .      | 0.256 <sup>b</sup> | 0.057 <sup>b</sup> | 0.102 <sup>a</sup>  | 0.099 <sup>ab</sup> | .                    |
| SEM                                                 |                  |         |                     |                     |                     | 0.0091              |                     |        |                     |                    | 0.0037              | 0.0057             |        | 0.0053             | 0.0062             |                     | 0.0088              |                      |
|                                                     | low              |         | .                   | .                   | .                   | 0.969 <sup>b</sup>  | .                   | .      | .                   | .                  | .                   | 0.253 <sup>a</sup> | .      | 0.274 <sup>a</sup> | 0.068 <sup>a</sup> | .                   | .                   | .                    |
|                                                     | high             |         | .                   | .                   | .                   | 0.992 <sup>a</sup>  | .                   | .      | .                   | .                  | .                   | 0.242 <sup>b</sup> | .      | 0.254 <sup>b</sup> | 0.054 <sup>b</sup> | .                   | .                   | .                    |
|                                                     | SEM              |         |                     |                     |                     | 0.0079              |                     |        |                     |                    |                     | 0.0051             |        | 0.0047             | 0.0054             |                     |                     |                      |
|                                                     |                  | -       | .                   | 0.321 <sup>a</sup>  | .                   | 0.996 <sup>a</sup>  | 0.905 <sup>a</sup>  | .      | .                   | .                  | 0.110 <sup>b</sup>  | 0.241 <sup>b</sup> | .      | 0.255 <sup>b</sup> | .                  | 0.089 <sup>b</sup>  | .                   | 2.449 <sup>a</sup>   |
|                                                     |                  | +       | .                   | 0.311 <sup>b</sup>  | .                   | 0.965 <sup>b</sup>  | 0.865 <sup>b</sup>  | .      | .                   | .                  | 0.118 <sup>a</sup>  | 0.254 <sup>a</sup> | .      | 0.273 <sup>a</sup> | .                  | 1.000 <sup>a</sup>  | .                   | 2.409 <sup>b</sup>   |
|                                                     |                  | SEM     |                     | 0.0032              |                     | 0.0079              | 0.0070              |        |                     |                    | 0.0032              | 0.0051             |        | 0.0047             |                    |                     |                     | 0.0082               |

Table continued on next page.

**Supplemental Table 4.** Continuation.

| <i>ANOVA</i>                     |        |        |        |       |        |      |       |        |       |       |      |        |       |       |       |        |
|----------------------------------|--------|--------|--------|-------|--------|------|-------|--------|-------|-------|------|--------|-------|-------|-------|--------|
| ABC                              | <0.001 | <0.001 | <0.001 | 0.024 | 0.005  | 0.25 | 0.008 | <0.001 | 0.037 | 0.001 | 0.07 | 0.002  | 0.036 | 0.033 | 0.030 | <0.001 |
| Ca concentration                 | 0.007  | 0.10   | 0.017  | 0.014 | 0.18   | 0.42 | 0.18  | 0.19   | 0.48  | 0.036 | 0.21 | <0.001 | 0.027 | 0.29  | 0.35  | 0.50   |
| Phytase                          | 0.39   | 0.019  | 0.97   | 0.001 | <0.001 | 0.16 | 0.31  | 0.50   | 0.032 | 0.024 | 0.10 | <0.001 | 0.13  | 0.010 | 0.51  | <0.001 |
| ABC × Ca concentration           | 0.037  | <0.001 | 0.007  | 0.49  | 0.006  | 0.57 | 0.82  | 0.038  | 0.20  | 0.65  | 0.49 | 0.87   | 0.92  | 0.11  | 0.82  | 0.027  |
| ABC × Phytase                    | 0.54   | 0.17   | 0.96   | 0.73  | 0.29   | 0.94 | 0.98  | 0.84   | 0.86  | 0.88  | 0.94 | 0.23   | 0.93  | 0.78  | 0.96  | 0.15   |
| Ca concentration × Phytase       | 0.30   | 0.92   | 0.60   | 0.62  | 0.71   | 0.72 | 0.70  | 0.55   | 0.87  | 0.47  | 0.55 | 0.20   | 0.40  | 0.74  | 0.72  | 0.98   |
| ABC × Ca concentration × Phytase | 0.71   | 0.65   | 0.43   | 0.70  | 0.85   | 0.33 | 0.46  | 0.60   | 0.43  | 0.49  | 0.35 | 0.81   | 0.43  | 0.49  | 0.41  | 0.69   |

<sup>1</sup> Values are least square means, n = 6 pens/treatment with 15 birds/pen. <sup>a,b</sup> Labeled means of a comparison without a common lowercase superscript letter differ significantly,  $P \leq 0.050$ ; ABC, acid-binding capacity; KEGG pathways: 01230 protein digestion and absorption, 00220 arginine biosynthesis, 00250 alanine, aspartic acid, and glutamic acid metabolism, 00260 glycine, serine, and threonine metabolism, 00270 cysteine and methionine metabolism, 00280 valine, leucine, and isoleucine degradation, 00290 valine, leucine, and isoleucine biosynthesis, 00300 lysine biosynthesis, 00310 lysine degradation, 00330 arginine and proline metabolism, 00340 histidine metabolism, 00350 tyrosine metabolism, 00360 phenylalanine metabolism, 00380 tryptophan metabolism, 00400 phenylalanine, tyrosine, and tryptophan biosynthesis, 04974 biosynthesis of amino acids; Ca, calcium; SEM, standard error of the means.

<sup>2</sup> Only presented if significant ( $P \leq 0.05$ ) and if the three-way interaction is not significant ( $P > 0.05$ ).

<sup>3</sup> Only presented if significant ( $P \leq 0.05$ ) and if the three-way interaction and no 2-way interaction including the respective trait are not significant ( $P > 0.05$ ).

**Supplemental Table 5.** Percent of genes assigned to enzymes related to protein digestion and absorption as well as amino acid metabolism listed in the KEGG database in ileum content of broiler chickens fed with differently acidified diets with low and high Ca concentrations without (-) and with (+) supplementation of 1,500 FTU phytase/kg.<sup>1</sup>

| ABC                                                 | Ca concentration | Phytase | 01230             | 00220  | 00250              | 00260              | 00270              | 00280  | 00290  | 00300               | 00310              | 00330               | 00340              | 00350              | 00360              | 00380  | 00400  | 04974               |
|-----------------------------------------------------|------------------|---------|-------------------|--------|--------------------|--------------------|--------------------|--------|--------|---------------------|--------------------|---------------------|--------------------|--------------------|--------------------|--------|--------|---------------------|
| <i>Treatments</i>                                   |                  |         |                   |        |                    |                    |                    |        |        |                     |                    |                     |                    |                    |                    |        |        |                     |
| CaCO <sub>3</sub>                                   | low              | -       | 2.46              | 0.305  | 0.712              | 1.059              | 0.912              | 0.120  | 0.046  | 0.743               | 0.098              | 0.212               | 0.030              | 0.241              | 0.045              | 0.072  | 0.072  | 0.027               |
|                                                     |                  | +       | 2.45              | 0.319  | 0.737              | 1.028              | 0.911              | 0.125  | 0.050  | 0.734               | 0.102              | 0.223               | 0.026              | 0.246              | 0.040              | 0.078  | 0.071  | 0.030               |
|                                                     | high             | -       | 2.51              | 0.333  | 0.722              | 1.064              | 0.968              | 0.127  | 0.052  | 0.719               | 0.098              | 0.214               | 0.022              | 0.215              | 0.034              | 0.069  | 0.080  | 0.034               |
|                                                     |                  | +       | 2.49              | 0.318  | 0.737              | 1.022              | 0.920              | 0.129  | 0.059  | 0.725               | 0.102              | 0.231               | 0.036              | 0.243              | 0.043              | 0.078  | 0.086  | 0.029               |
| CaCO <sub>3</sub> +<br>formic acid                  | low              | -       | 2.44              | 0.299  | 0.721              | 1.055              | 0.926              | 0.128  | 0.049  | 0.726               | 0.101              | 0.209               | 0.022              | 0.223              | 0.032              | 0.074  | 0.069  | 0.037               |
|                                                     |                  | +       | 2.40              | 0.294  | 0.730              | 1.010              | 0.868              | 0.126  | 0.050  | 0.723               | 0.106              | 0.223               | 0.029              | 0.251              | 0.037              | 0.086  | 0.067  | 0.032               |
|                                                     | high             | -       | 2.49              | 0.327  | 0.730              | 1.064              | 0.960              | 0.126  | 0.048  | 0.737               | 0.096              | 0.211               | 0.018              | 0.225              | 0.035              | 0.068  | 0.071  | 0.033               |
|                                                     |                  | +       | 2.45              | 0.310  | 0.724              | 1.045              | 0.915              | 0.124  | 0.046  | 0.731               | 0.100              | 0.215               | 0.024              | 0.237              | 0.036              | 0.075  | 0.068  | 0.031               |
| Ca-formate                                          | low              | -       | 2.46              | 0.316  | 0.723              | 1.048              | 0.933              | 0.126  | 0.047  | 0.719               | 0.100              | 0.209               | 0.021              | 0.222              | 0.027              | 0.075  | 0.070  | 0.035               |
|                                                     |                  | +       | 2.41              | 0.290  | 0.717              | 1.033              | 0.878              | 0.123  | 0.044  | 0.726               | 0.104              | 0.214               | 0.027              | 0.241              | 0.032              | 0.082  | 0.063  | 0.032               |
|                                                     | high             | -       | 2.44              | 0.298  | 0.708              | 1.050              | 0.911              | 0.127  | 0.045  | 0.706               | 0.103              | 0.205               | 0.022              | 0.215              | 0.020              | 0.079  | 0.068  | 0.037               |
|                                                     |                  | +       | 2.47              | 0.299  | 0.708              | 1.047              | 0.911              | 0.126  | 0.053  | 0.708               | 0.103              | 0.210               | 0.033              | 0.214              | 0.026              | 0.077  | 0.085  | 0.035               |
|                                                     | SEM              |         | 0.026             | 0.0111 | 0.0069             | 0.0143             | 0.0239             | 0.0025 | 0.0037 | 0.0081              | 0.0020             | 0.0054              | 0.0050             | 0.0112             | 0.0058             | 0.0039 | 0.0058 | 0.0026              |
| <i>Significant two-way interactions<sup>2</sup></i> |                  |         |                   |        |                    |                    |                    |        |        |                     |                    |                     |                    |                    |                    |        |        |                     |
| ABC × Ca concentration                              |                  |         |                   |        |                    |                    |                    |        |        |                     |                    |                     |                    |                    |                    |        |        |                     |
| CaCO <sub>3</sub>                                   | low              |         | .                 | .      | .                  | .                  | .                  | .      | .      | 0.738 <sup>a</sup>  | .                  | .                   | .                  | .                  | .                  | .      | .      | .                   |
|                                                     | high             |         | .                 | .      | .                  | .                  | .                  | .      | .      | 0.722 <sup>ab</sup> | .                  | .                   | .                  | .                  | .                  | .      | .      | .                   |
| CaCO <sub>3</sub> +<br>formic acid                  | low              |         | .                 | .      | .                  | .                  | .                  | .      | .      | 0.724 <sup>a</sup>  | .                  | .                   | .                  | .                  | .                  | .      | .      | .                   |
|                                                     | high             |         | .                 | .      | .                  | .                  | .                  | .      | .      | 0.734 <sup>a</sup>  | .                  | .                   | .                  | .                  | .                  | .      | .      | .                   |
| Ca-Formate                                          | low              |         | .                 | .      | .                  | .                  | .                  | .      | .      | 0.722 <sup>ab</sup> | .                  | .                   | .                  | .                  | .                  | .      | .      | .                   |
|                                                     | high             |         | .                 | .      | .                  | .                  | .                  | .      | .      | 0.707 <sup>b</sup>  | .                  | .                   | .                  | .                  | .                  | .      | .      | .                   |
| SEM                                                 |                  |         |                   |        |                    |                    |                    |        |        | 0.0058              |                    |                     |                    |                    |                    |        |        |                     |
| <i>Significant main effects<sup>3</sup></i>         |                  |         |                   |        |                    |                    |                    |        |        |                     |                    |                     |                    |                    |                    |        |        |                     |
| CaCO <sub>3</sub>                                   |                  |         | .                 | .      | 0.727 <sup>a</sup> | .                  | .                  | .      | .      | .                   | .                  | 0.220 <sup>a</sup>  | .                  | .                  | 0.041 <sup>a</sup> | .      | .      | 0.030 <sup>b</sup>  |
| CaCO <sub>3</sub> + formic acid                     |                  |         | .                 | .      | 0.726 <sup>a</sup> | .                  | .                  | .      | .      | .                   | .                  | 0.214 <sup>ab</sup> | .                  | .                  | 0.035 <sup>a</sup> | .      | .      | 0.033 <sup>ab</sup> |
| Ca-formate                                          |                  |         | .                 | .      | 0.714 <sup>b</sup> | .                  | .                  | .      | .      | .                   | .                  | 0.209 <sup>b</sup>  | .                  | .                  | 0.026 <sup>b</sup> | .      | .      | 0.035 <sup>a</sup>  |
| SEM                                                 |                  |         |                   |        | 0.0035             |                    |                    |        |        |                     |                    | 0.0033              |                    |                    | 0.0035             |        |        | 0.0013              |
|                                                     | low              |         | 2.44 <sup>b</sup> | .      | .                  | .                  | .                  | .      | .      | .                   | .                  | .                   | .                  | .                  | .                  | .      | .      | 0.069 <sup>b</sup>  |
|                                                     | high             |         | 2.47 <sup>a</sup> | .      | .                  | .                  | .                  | .      | .      | .                   | .                  | .                   | .                  | .                  | .                  | .      | .      | 0.076 <sup>a</sup>  |
|                                                     | SEM              |         | 0.011             |        |                    |                    |                    |        |        |                     |                    |                     |                    |                    |                    |        |        | 0.0029              |
|                                                     |                  | -       | .                 | .      | .                  | 1.057 <sup>a</sup> | 0.935 <sup>a</sup> | .      | .      | .                   | 0.099 <sup>b</sup> | 0.210 <sup>b</sup>  | 0.022 <sup>b</sup> | 0.224 <sup>b</sup> | .                  | 0.073  | .      | .                   |
|                                                     |                  | +       | .                 | .      | .                  | 1.031 <sup>b</sup> | 0.901 <sup>b</sup> | .      | .      | .                   | 0.103 <sup>a</sup> | 0.219 <sup>a</sup>  | 0.029 <sup>a</sup> | 0.239 <sup>a</sup> | .                  | 0.079  | .      | .                   |
|                                                     |                  | SEM     |                   |        |                    | 0.0069             | 0.0102             |        |        |                     | 0.0008             | 0.0029              | 0.0024             | 0.0053             |                    | 0.0017 |        |                     |

Table continued on next page.

**Supplemental Table 5.** Continuation.

| <i>ANOVA</i>                     |       |      |       |       |       |      |      |       |       |       |       |       |       |       |       |       |
|----------------------------------|-------|------|-------|-------|-------|------|------|-------|-------|-------|-------|-------|-------|-------|-------|-------|
| ABC                              | 0.13  | 0.10 | 0.019 | 0.99  | 0.53  | 0.96 | 0.17 | 0.019 | 0.20  | 0.023 | 0.30  | 0.22  | 0.003 | 0.39  | 0.08  | 0.046 |
| Ca concentration                 | 0.012 | 0.11 | 0.62  | 0.21  | 0.06  | 0.22 | 0.22 | 0.14  | 0.28  | 0.83  | 0.95  | 0.05  | 0.32  | 0.13  | 0.025 | 0.35  |
| Phytase                          | 0.09  | 0.22 | 0.14  | 0.002 | 0.016 | 0.79 | 0.21 | 0.94  | 0.004 | 0.002 | 0.019 | 0.020 | 0.26  | 0.005 | 0.68  | 0.18  |
| ABC × Ca concentration           | 0.73  | 0.24 | 0.22  | 0.50  | 0.57  | 0.10 | 0.14 | 0.038 | 0.08  | 0.47  | 0.50  | 0.74  | 0.61  | 0.27  | 0.35  | 0.28  |
| ABC × Phytase                    | 0.62  | 0.73 | 0.05  | 0.33  | 0.67  | 0.18 | 0.44 | 0.74  | 0.56  | 0.47  | 0.85  | 0.78  | 0.91  | 0.44  | 0.64  | 0.63  |
| Ca concentration × Phytase       | 0.34  | 0.72 | 0.40  | 0.57  | 0.81  | 0.94 | 0.28 | 0.75  | 0.43  | 0.89  | 0.16  | 0.80  | 0.56  | 0.48  | 0.11  | 0.71  |
| ABC × Ca concentration × Phytase | 0.35  | 0.21 | 0.53  | 0.61  | 0.34  | 0.76 | 0.36 | 0.63  | 0.82  | 0.49  | 0.34  | 0.32  | 0.51  | 0.53  | 0.29  | 0.35  |

<sup>1</sup> Values are least square means, n = 6 pens/treatment with 15 birds/pen. <sup>a,b</sup> Labeled means of a comparison without a common lowercase superscript letter differ significantly,  $P \leq 0.050$ ; ABC, acid-binding capacity; KEGG pathways: 01230 protein digestion and absorption, 00220 arginine biosynthesis, 00250 alanine, aspartic acid, and glutamic acid metabolism, 00260 glycine, serine, and threonine metabolism, 00270 cysteine and methionine metabolism, 00280 valine, leucine, and isoleucine degradation, 00290 valine, leucine, and isoleucine biosynthesis, 00300 lysine biosynthesis, 00310 lysine degradation, 00330 arginine and proline metabolism, 00340 histidine metabolism, 00350 tyrosine metabolism, 00360 phenylalanine metabolism, 00380 tryptophan metabolism, 00400 phenylalanine, tyrosine, and tryptophan biosynthesis, 04974 biosynthesis of amino acids; Ca, calcium SEM, standard error of the means.

<sup>2</sup> Only presented if significant ( $P \leq 0.05$ ) and if the three-way interaction is not significant ( $P > 0.05$ ).

<sup>3</sup> Only presented if significant ( $P \leq 0.05$ ) and if the three-way interaction and no 2-way interaction including the respective trait are not significant ( $P > 0.05$ ).



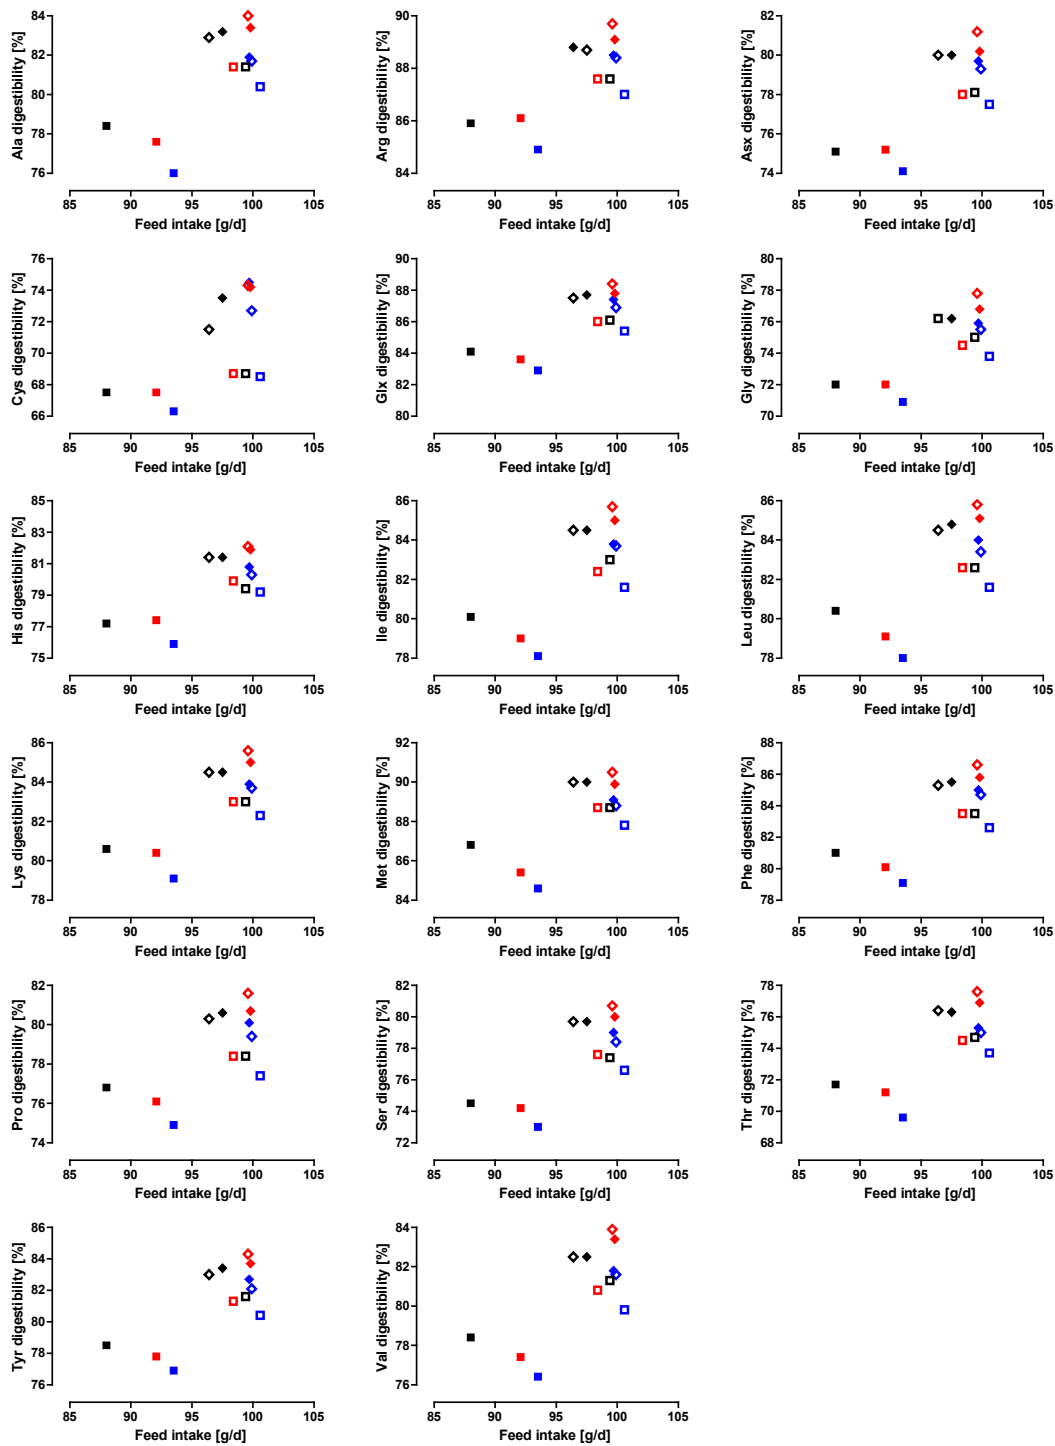

|                       |                   |   |                                 |   |            |   |
|-----------------------|-------------------|---|---------------------------------|---|------------|---|
| Symbols               |                   |   |                                 |   |            |   |
| Phytase               | -                 | + | -                               | + | -          | + |
| Ca concentration      | low               |   | high                            |   | Low        |   |
| Acid-binding capacity | CaCO <sub>3</sub> |   | CaCO <sub>3</sub> + formic acid |   | Ca-formate |   |

**Supplemental Figure 1.** Relationship between prececal amino acid digestibility and feed intake, symbols represent least square means, details of the statistical evaluation of feed intake are shown in the companion paper (1), n = 6 pens/treatment with 15 birds/pen.

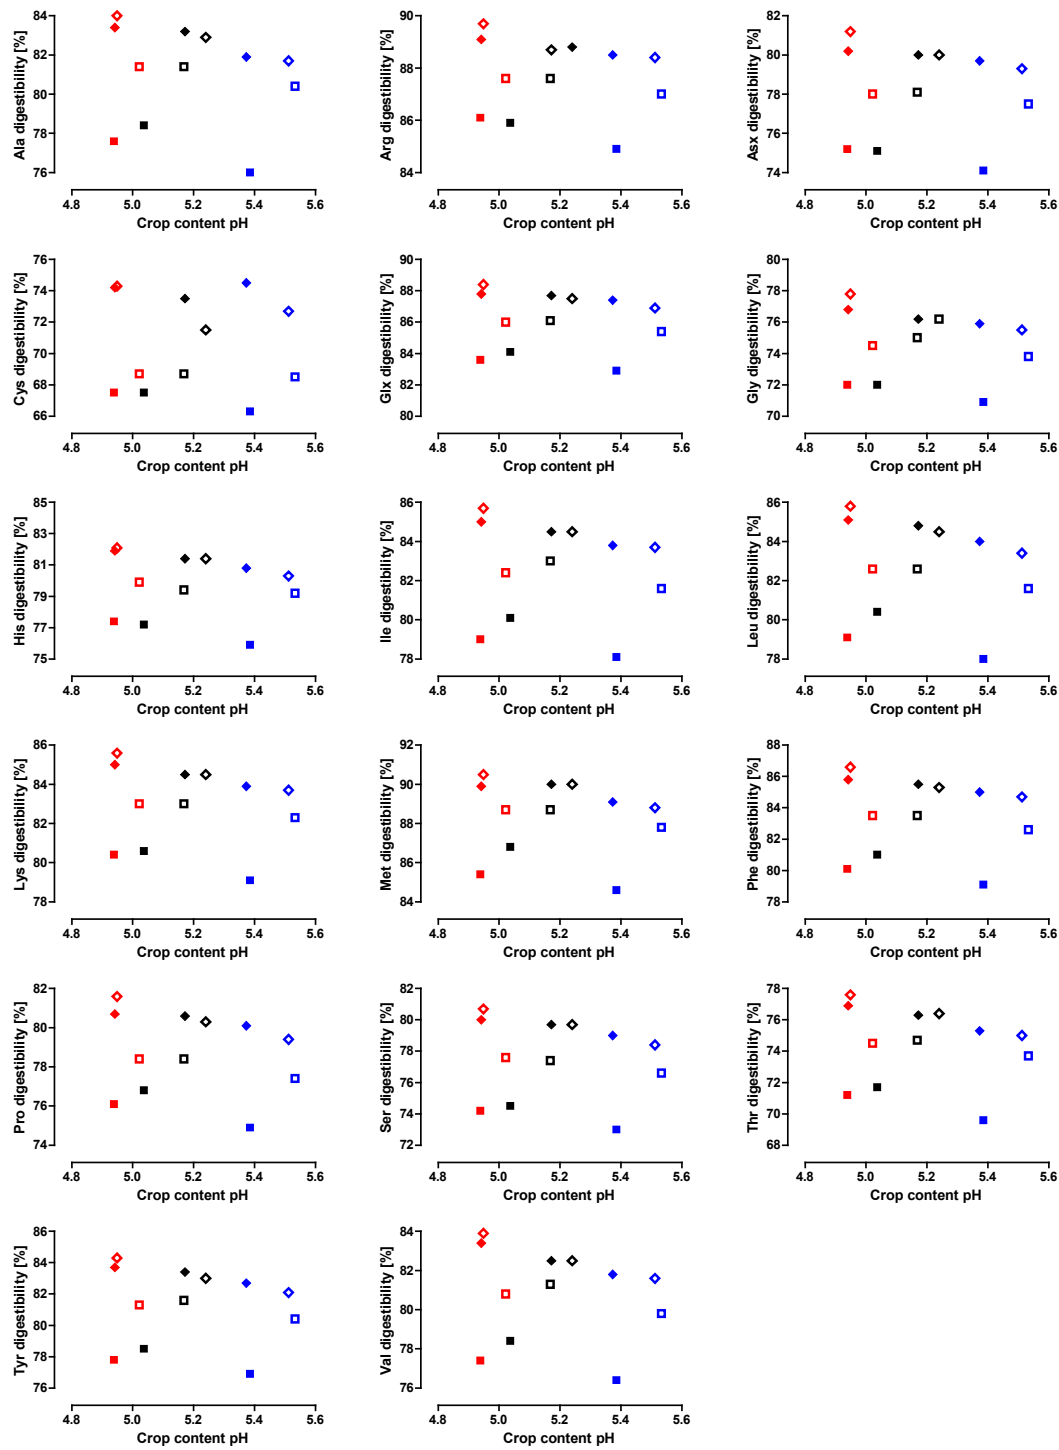

|                       |                   |   |      |   |                                 |   |      |   |            |   |      |   |
|-----------------------|-------------------|---|------|---|---------------------------------|---|------|---|------------|---|------|---|
| Symbols               |                   |   |      |   |                                 |   |      |   |            |   |      |   |
| Phytase               | -                 | + | -    | + | -                               | + | -    | + | -          | + | -    | + |
| Ca concentration      | low               |   | high |   | low                             |   | high |   | Low        |   | High |   |
| Acid-binding capacity | CaCO <sub>3</sub> |   |      |   | CaCO <sub>3</sub> + formic acid |   |      |   | Ca-formate |   |      |   |

**Supplemental Figure 2.** Relationship between prececal amino acid digestibility and crop content pH, symbols represent least square means, details of the statistical evaluation of crop content pH are shown in the companion paper (1), n = 6 pens/treatment with 15 birds/pen.

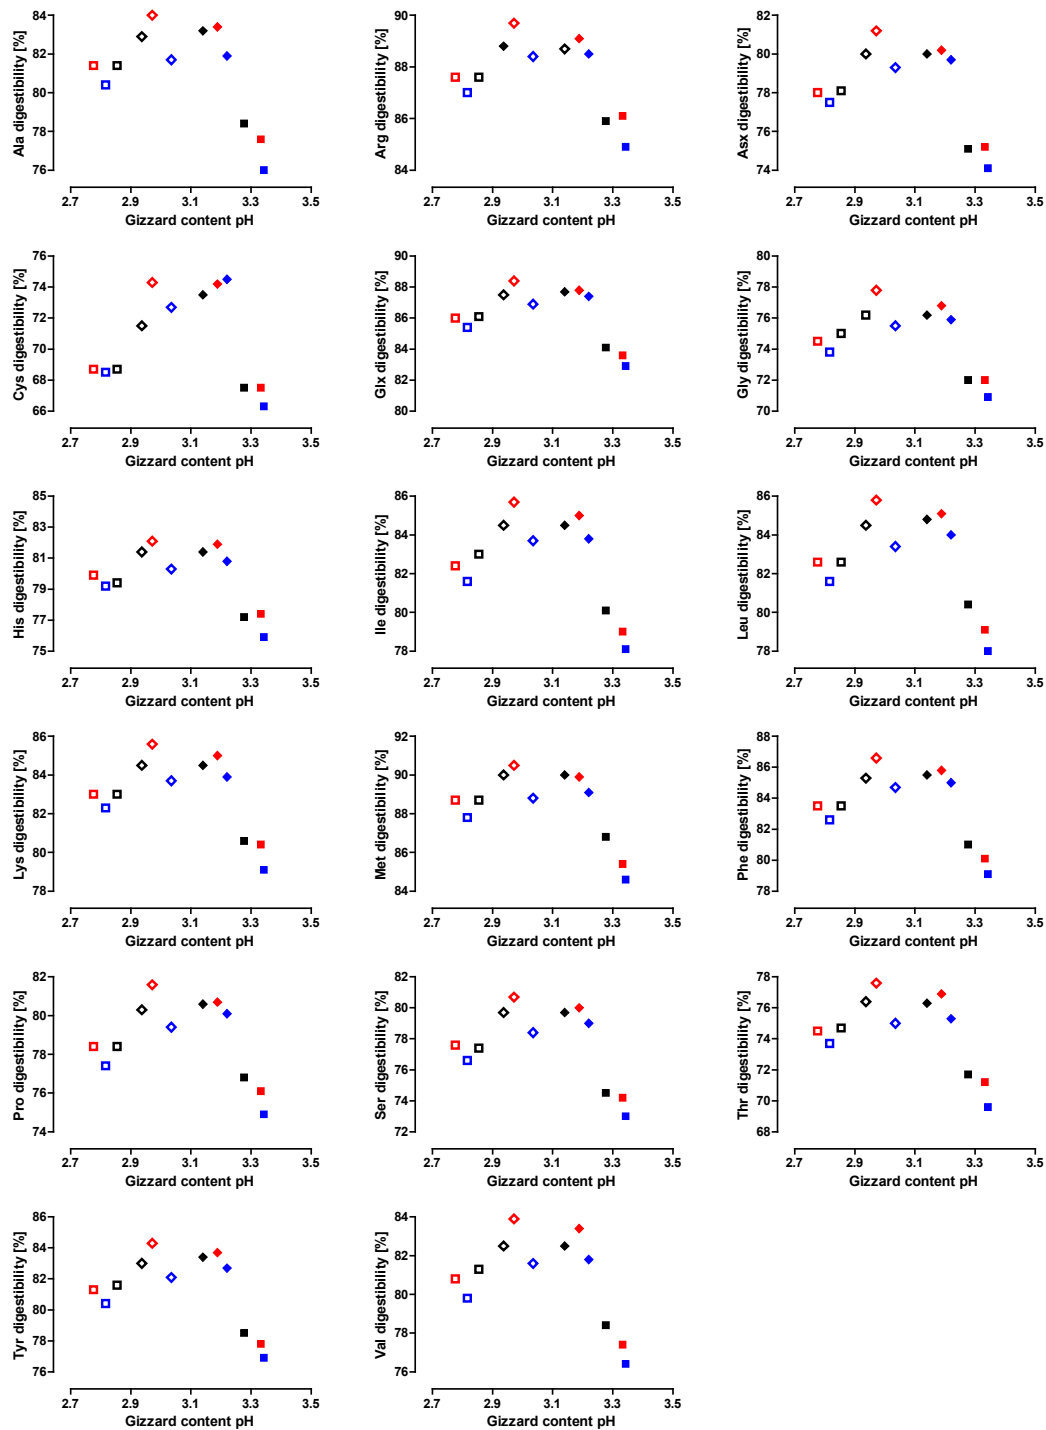

|                       |                   |   |   |   |                                 |   |   |   |            |   |   |   |      |  |  |  |
|-----------------------|-------------------|---|---|---|---------------------------------|---|---|---|------------|---|---|---|------|--|--|--|
| Symbols               |                   |   |   |   |                                 |   |   |   |            |   |   |   |      |  |  |  |
| Phytase               | -                 | + | - | + | -                               | + | - | + | -          | + | - | + |      |  |  |  |
| Ca concentration      | low               |   |   |   | high                            |   |   |   | Low        |   |   |   | High |  |  |  |
| Acid-binding capacity | CaCO <sub>3</sub> |   |   |   | CaCO <sub>3</sub> + formic acid |   |   |   | Ca-formate |   |   |   |      |  |  |  |

**Supplemental Figure 3.** Relationship between prececal amino acid digestibility and gizzard content pH, symbols represent least square means, details of the statistical evaluation of gizzard content pH are shown in the companion paper (1), n = 6 pens/treatment with 15 birds/pen.

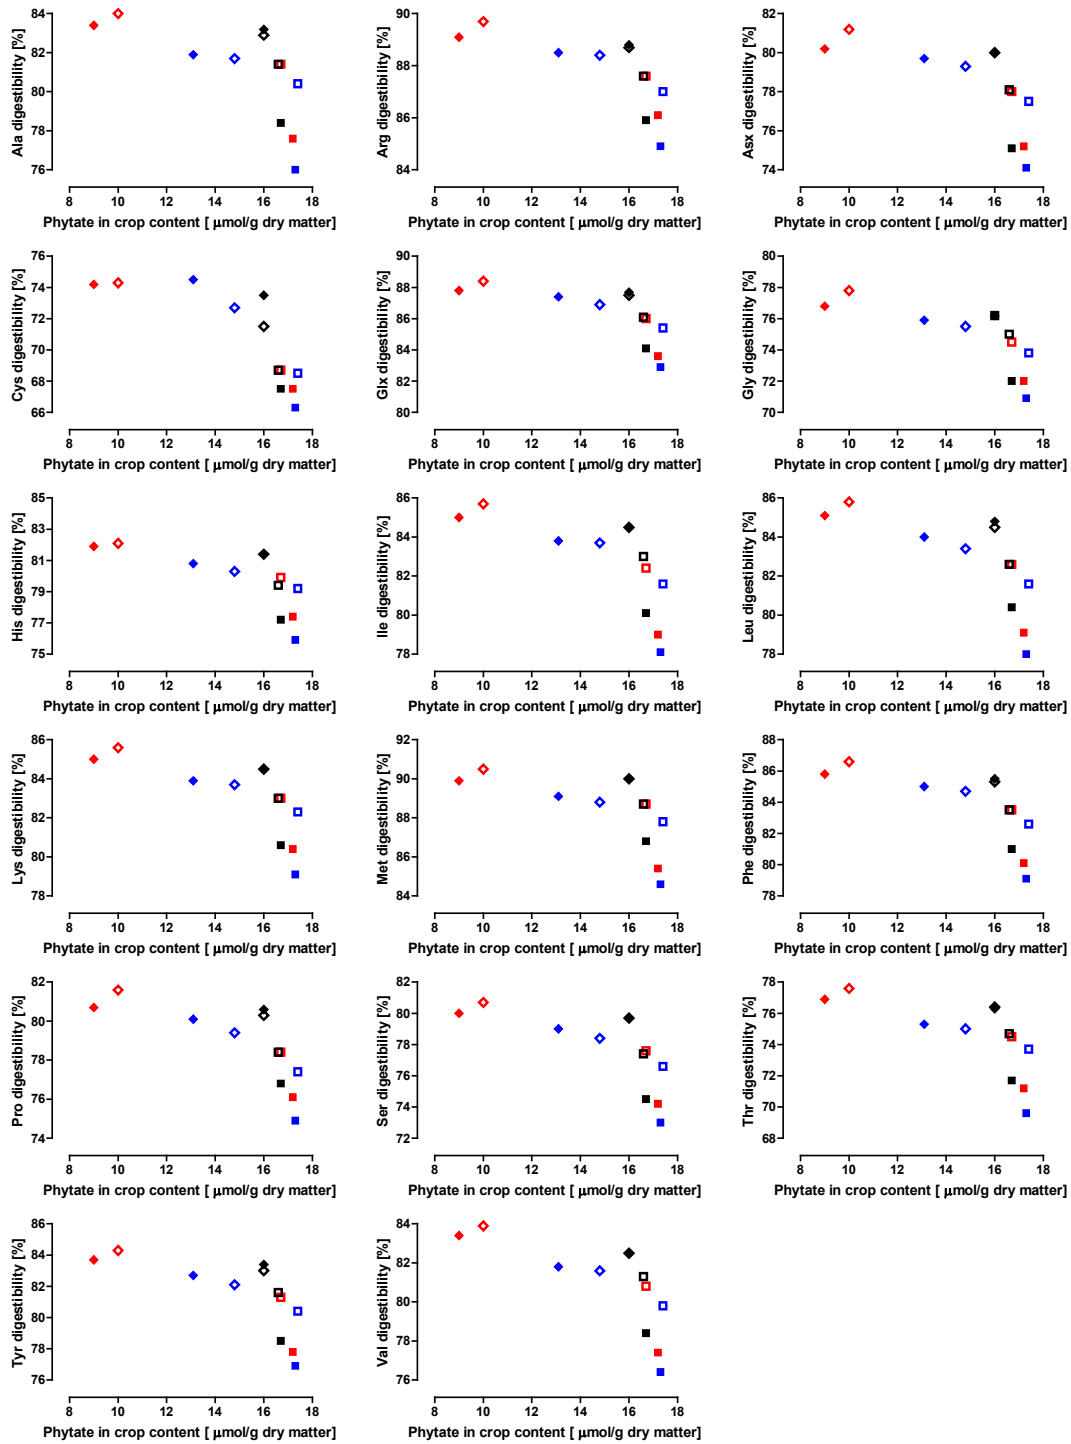

|                       |                   |   |   |   |                                 |   |   |   |            |   |   |   |      |  |  |  |
|-----------------------|-------------------|---|---|---|---------------------------------|---|---|---|------------|---|---|---|------|--|--|--|
| Symbols               |                   |   |   |   |                                 |   |   |   |            |   |   |   |      |  |  |  |
| Phytase               | -                 | + | - | + | -                               | + | - | + | -          | + | - | + |      |  |  |  |
| Ca concentration      | low               |   |   |   | high                            |   |   |   | Low        |   |   |   | High |  |  |  |
| Acid-binding capacity | CaCO <sub>3</sub> |   |   |   | CaCO <sub>3</sub> + formic acid |   |   |   | Ca-formate |   |   |   |      |  |  |  |

**Supplemental Figure 4.** Relationship between prececal amino acid digestibility and phytate concentration in the crop content, symbols represent least square means, details of the statistical evaluation of phytate in crop content are shown in the companion paper (1), n = 6 pens/treatment with 15 birds/pen.

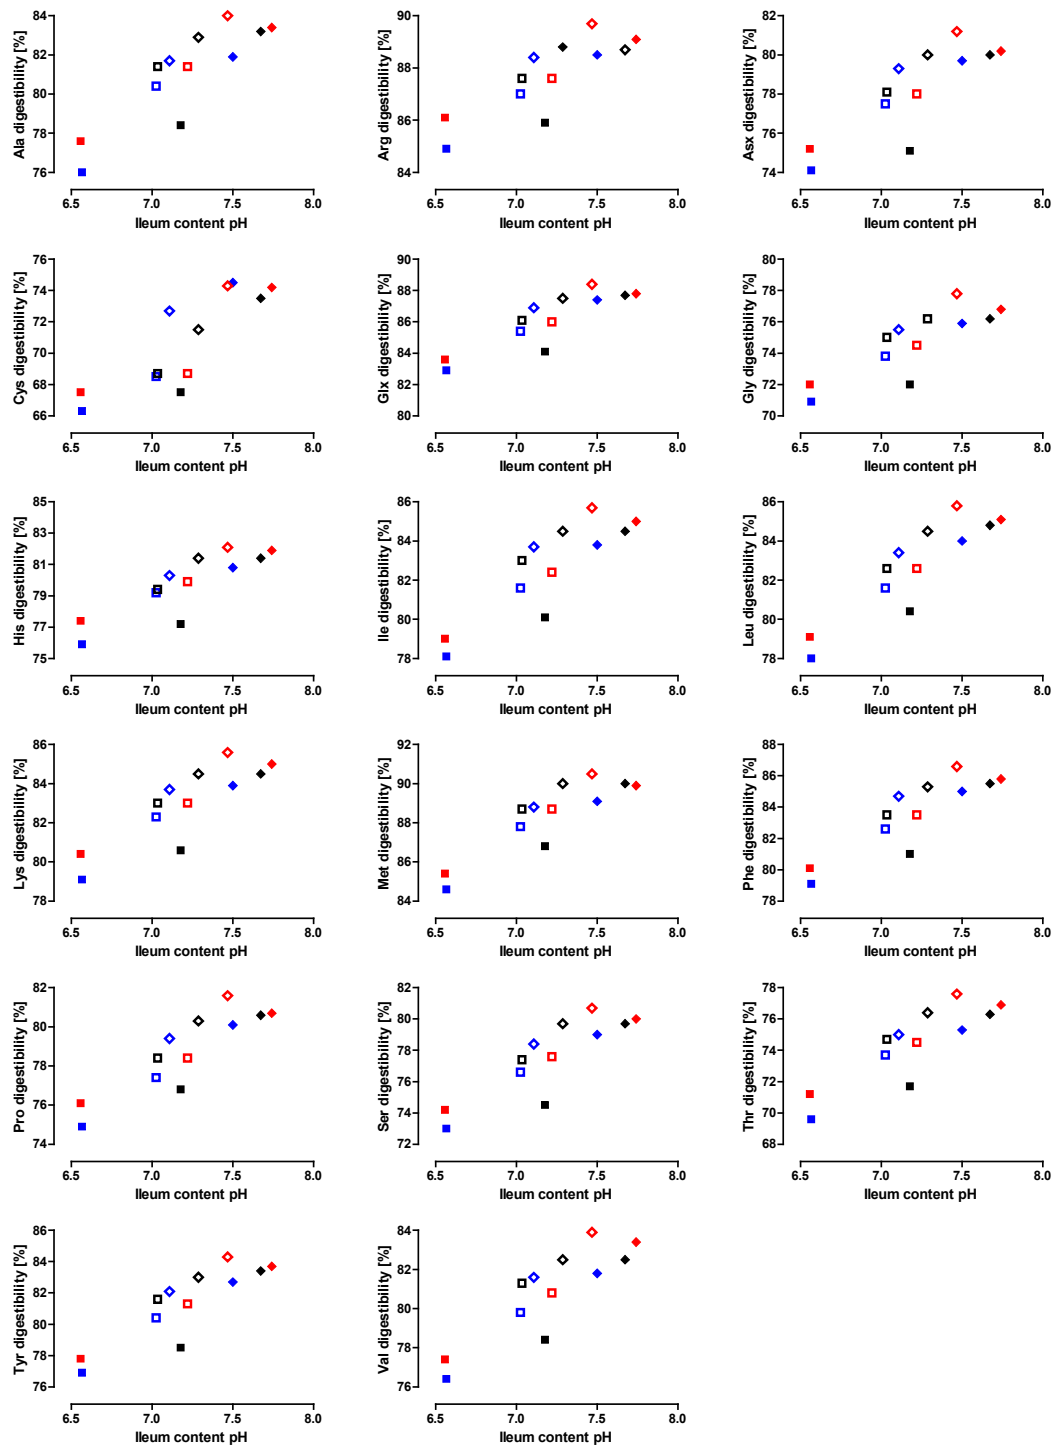

|                       |                   |   |                                 |   |            |      |
|-----------------------|-------------------|---|---------------------------------|---|------------|------|
| Symbols               |                   |   |                                 |   |            |      |
| Phytase               | -                 | + | -                               | + | -          | +    |
| Ca concentration      | low               |   | high                            |   | Low        | High |
| Acid-binding capacity | CaCO <sub>3</sub> |   | CaCO <sub>3</sub> + formic acid |   | Ca-formate |      |

**Supplemental Figure 5.** Relationship between prececal amino acid digestibility and pH in the ileum content, symbols represent least square means, details of the statistical evaluation of ileum content pH are shown in the companion paper (1), n = 6 pens/treatment with 15 birds/pen.

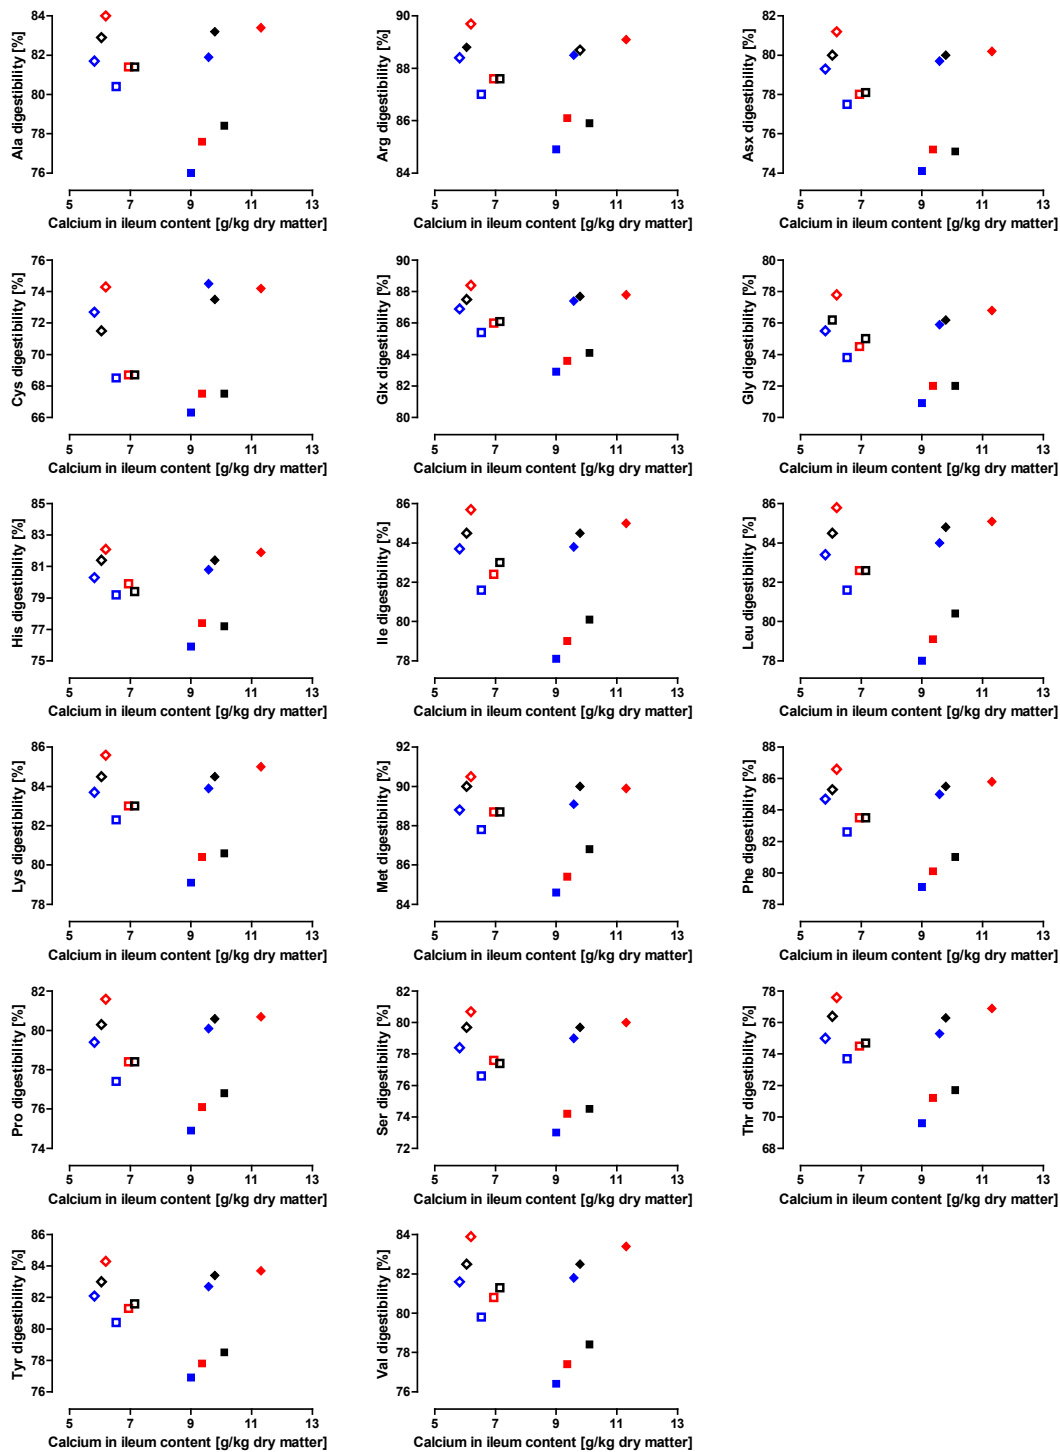

|                       |                   |   |   |   |                                 |   |   |   |            |   |      |   |
|-----------------------|-------------------|---|---|---|---------------------------------|---|---|---|------------|---|------|---|
| Symbols               |                   |   |   |   |                                 |   |   |   |            |   |      |   |
| Phytase               | -                 | + | - | + | -                               | + | - | + | -          | + | -    | + |
| Ca concentration      | low               |   |   |   | high                            |   |   |   | Low        |   | High |   |
| Acid-binding capacity | CaCO <sub>3</sub> |   |   |   | CaCO <sub>3</sub> + formic acid |   |   |   | Ca-formate |   |      |   |

**Supplemental Figure 6.** Relationship between prececal amino acid digestibility and calcium in the ileum content, symbols represent least square means, details of the statistical evaluation of calcium in ileum content are shown in the companion paper (1), n = 6 pens/treatment with 15 birds/pen.

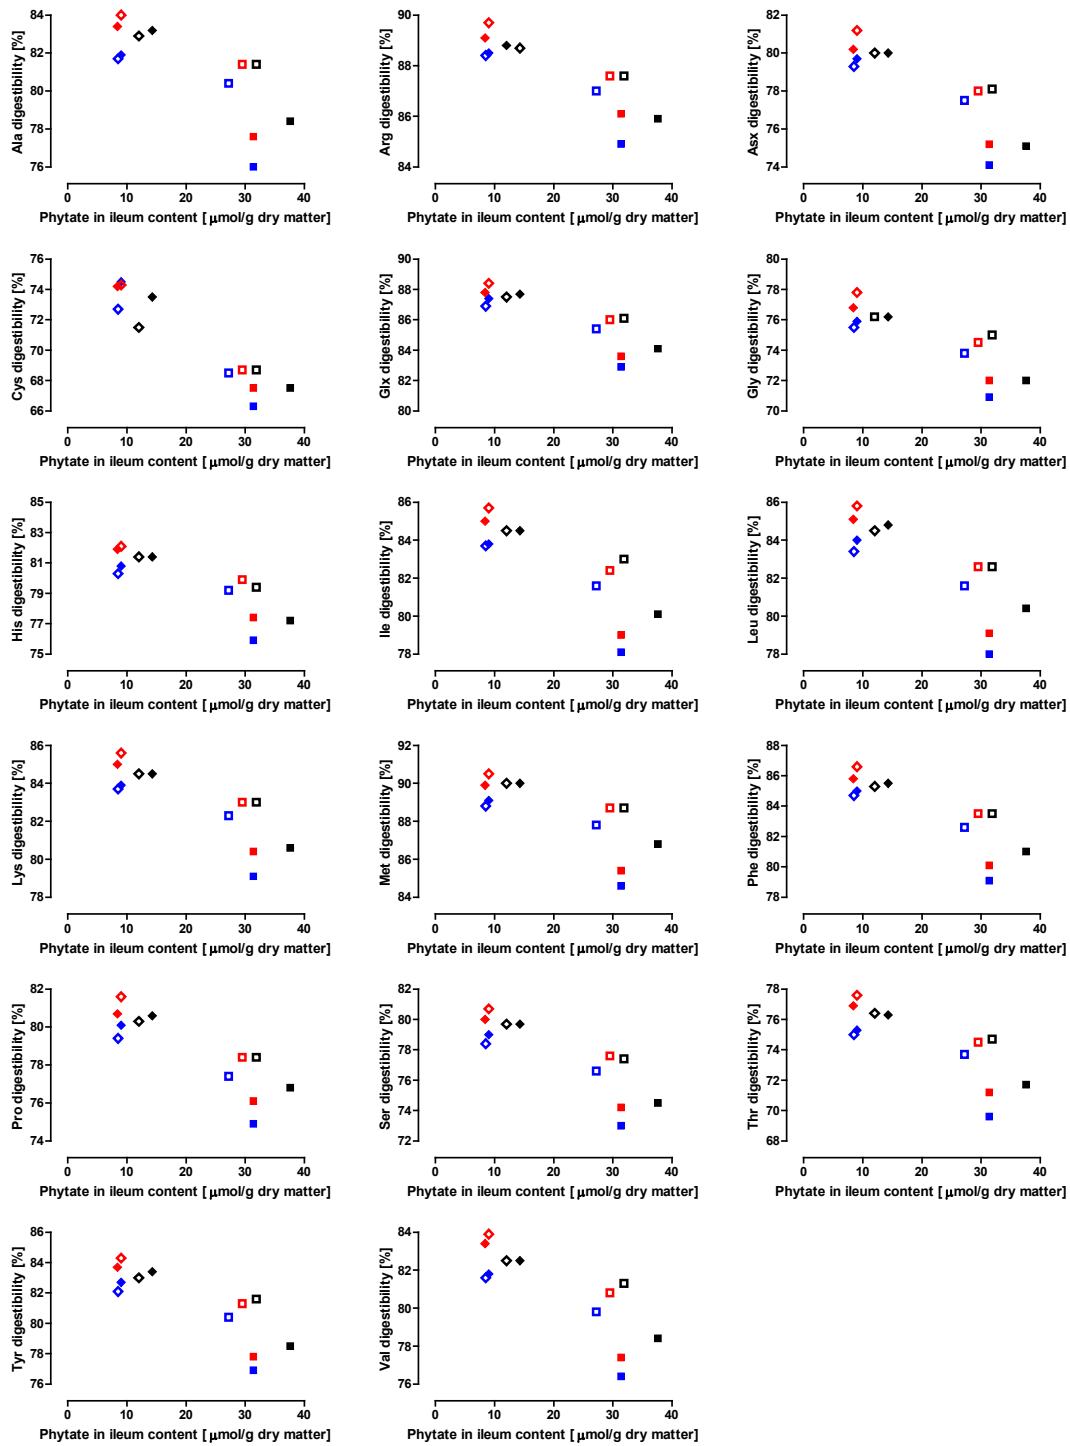

|                       |                   |   |                                 |   |            |   |      |   |
|-----------------------|-------------------|---|---------------------------------|---|------------|---|------|---|
| Symbols               |                   |   |                                 |   |            |   |      |   |
| Phytase               | -                 | + | -                               | + | -          | + | -    | + |
| Ca concentration      | low               |   | high                            |   | low        |   | high |   |
| Acid-binding capacity | CaCO <sub>3</sub> |   | CaCO <sub>3</sub> + formic acid |   | Ca-formate |   |      |   |

**Supplemental Figure 7.** Relationship between prececal amino acid digestibility and phytate in the ileum content, symbols represent least square means, details of the statistical evaluation of phytate in ileum content are shown in the companion paper (1), n = 6 pens/treatment with 15 birds/pen.

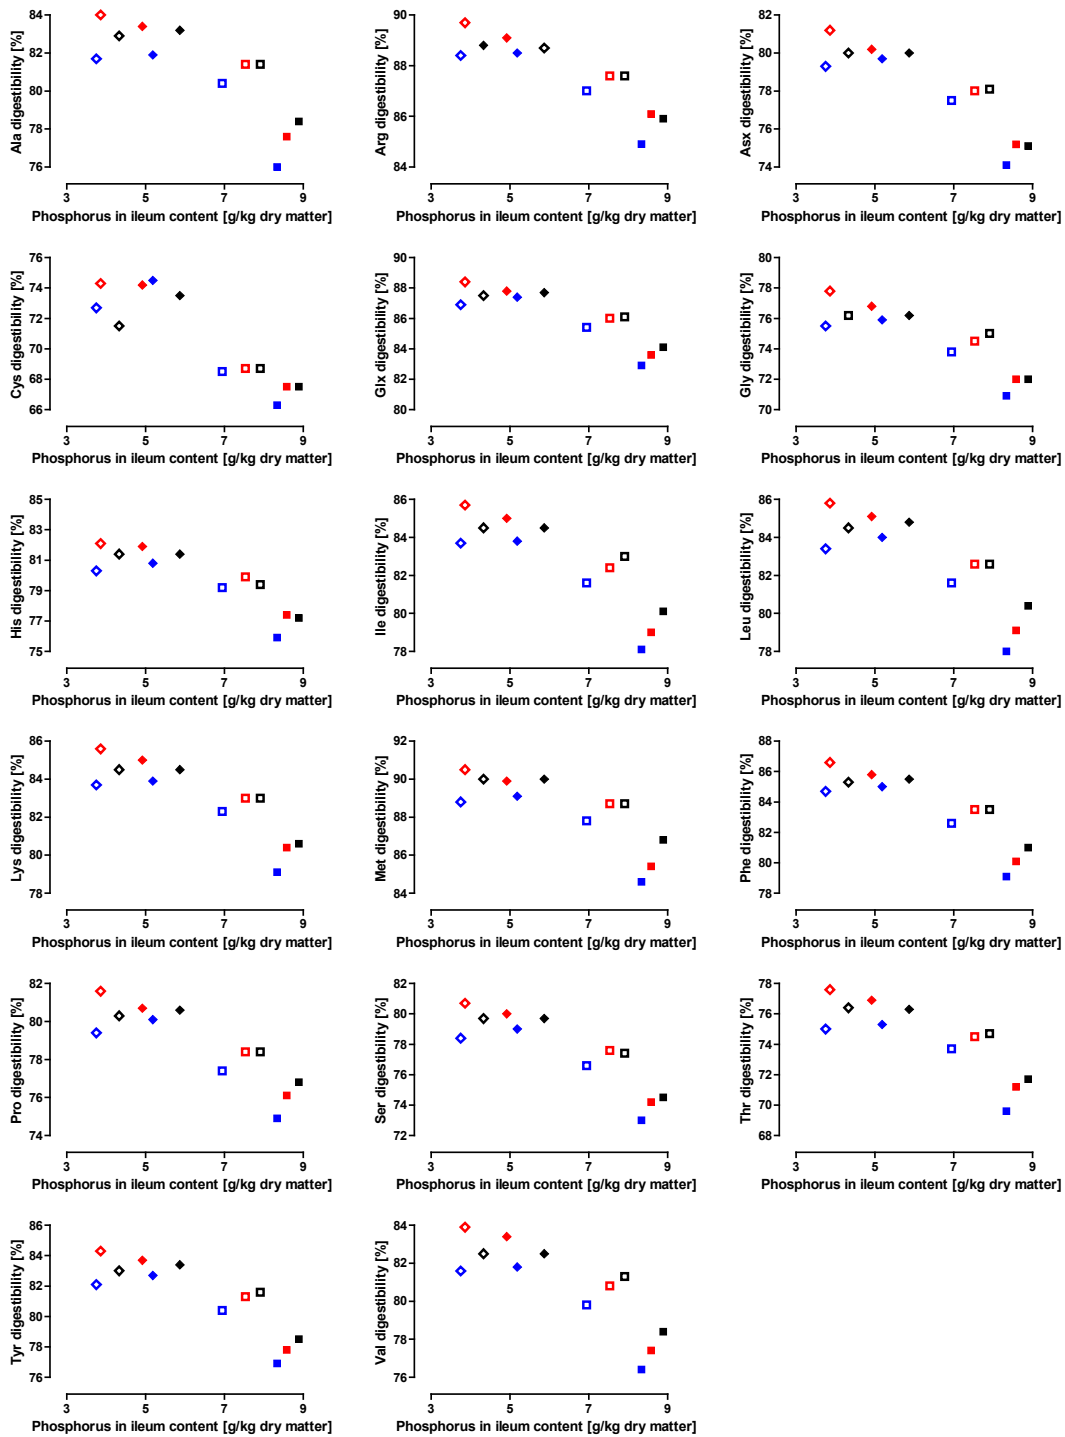

|                       |                   |   |                                 |   |            |   |
|-----------------------|-------------------|---|---------------------------------|---|------------|---|
| Symbols               |                   |   |                                 |   |            |   |
| Phytase               | -                 | + | -                               | + | -          | + |
| Ca concentration      | low               |   | high                            |   | Low        |   |
| Acid-binding capacity | CaCO <sub>3</sub> |   | CaCO <sub>3</sub> + formic acid |   | Ca-formate |   |

**Supplemental Figure 8.** Relationship between prececal amino acid digestibility and phosphorus in the ileum content, symbols represent least square means, details of the statistical evaluation of phosphorus in ileum content are shown in the companion paper (1), n = 6 pens/treatment with 15 birds/pen.



## Reference

1. Krieg J, Borda-Molina D, Siegert W, Sommerfeld V, Chi Y-P, Taheri HR, Feuerstein D, Camarinha-Silva A, Rodehutschord M. Effects of calcium level and source, formic acid, and phytase on phytate degradation and the microbiota in the digestive tract of broiler chickens. *Anim Microbiome* 2021;3:23. (doi: 10.1186/s42523-021-00083-7)
